# Supplementary material for: A Comprehensive Molecular and Clinical Investigation of Approved Anti-HCV Drugs Repurposing against SARS-CoV-2 Infection: A Glaring Gap between Benchside and Bedside Medicine
Source: MDPI journal article supplement (doi:10.3390/vaccines11030515), 2023-02-22
Supplement: s1 [file s1]

### RdRp-SOF and –remdesivir molecular interaction and simulation

The binding pockets residues like Asp623, Thr680, Thr687 and Asp760 were involved in polar contact formation with remdesivir. Pi-interactions of Arg553, Asp623, Arg624 and Ser681 with a functional group of ligands stabilized the ligand binding (Figure S1A). Similarly, SOF formed multiple H-bonds with Thr556, Asp-623, Arg-624 and Ser-628. Besides this, Cys622 was involved in Pi-sulfur interaction with aromatic groups and Asp623 formed attractive interaction with a charged group of the ligand (Figure S1B). RdRp, Remdesivir and SOF showed RMSD in range of 0.1 to 0.4 nm (Figure S1C and D).

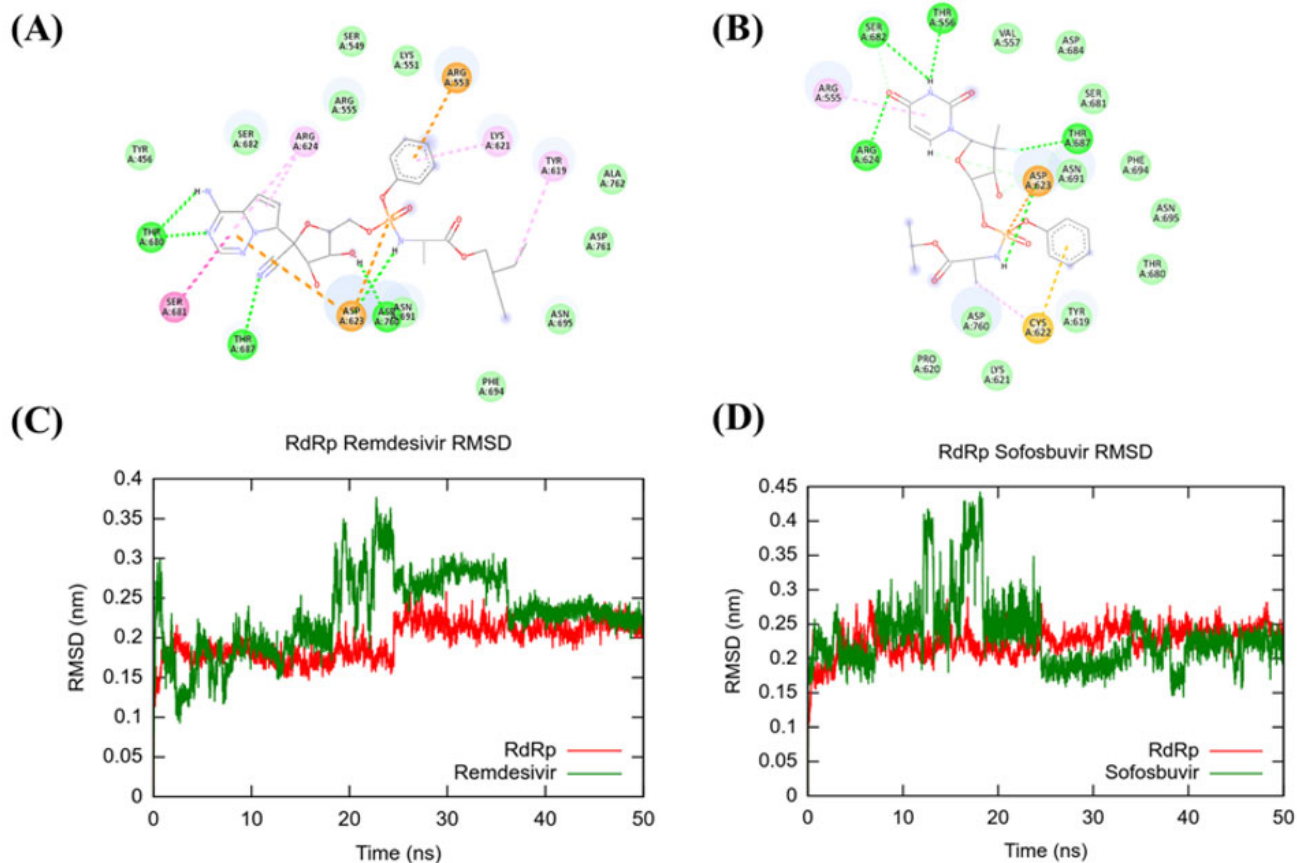

**Figure S1.** Molecular interactions of RdRp with (A) Remdesivir (B) SOF. RMSD of RdRp in complex with (C) Remdesivir (D) SOF upon 50ns simulation.

## Potential energy plots for simulated complexes

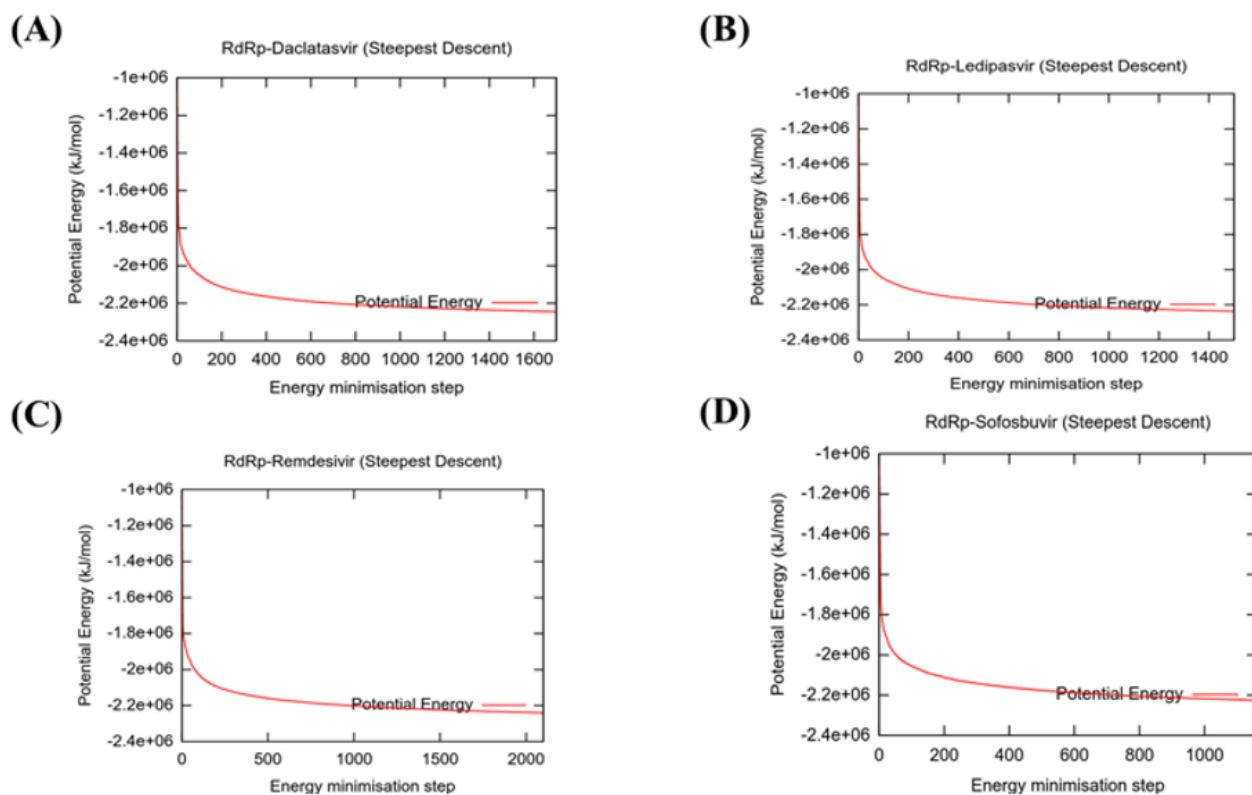

**Figure S2.** Potential energy plots for RdRp in complex with (A) DCV (B) LDP (C) Remdesivir and (D) SOF after 50 ns simulation.

**Table S1.** Binding score and predicted affinity of selected ligands against RdRp of SARS-CoV-2.

| Ligand      | Binding Score (Kcal/mol) | Binding Affinty ( $-\log_{10}(\text{KD} \text{Ki})$ ) |
|-------------|--------------------------|-------------------------------------------------------|
| Remdesivir  | -8.2                     | 11.6                                                  |
| Ledipasvir  | -9.4                     | 93.6                                                  |
| Daclatasvir | -7.8                     | 24.3                                                  |
| Sofosbuvir  | -7.6                     | -25.4                                                 |
